# Supplementary material for: Identification of two functional xyloglucan galactosyltransferase homologs BrMUR3 and BoMUR3 in brassicaceous vegetables
Source: PeerJ. 2020 May 14;8:e9095. doi: 10.7717/peerj.9095 (PMC7231499; doi:10.7717/peerj.9095)
Supplement: Supplemental Information 5 [file peerj-08-9095-s005.xlsx]

## Sheet: Sheet1
Table 1 raw data:Cell wall monosaccharide compositions of wild-type, mur3-3, and the complementary transgenic plants.
Samples	Man	Rha	Glc A	Gal A	GLC	Gal	Xyl	Ara	Fuc
WT-1	12.62	5.27	10.4	76.38	29.05	33.89	17.04	21.03	0.96
WT-2	13.53	4.79	9.64	76.94	27.54	32.65	15.8	22.32	0.99
WT-3	12.25	4.94	9.96	75.28	27.41	34.86	15.46	21.44	1.05
mur3-3-1	12.56	5.38	10.44	78.55	26.98	28.84	17.58	21.72	0.61
mur3-3-2	12.15	4.98	10.76	72.65	27.84	28.37	16.2	22.42	0.58
mur3-3-3	12.48	4.94	9.71	78.6	27.07	25.89	16.02	22.76	0.61
BrMUR3com #10-1	12.99	4.76	9.87	80.52	27	34.26	17.45	23.04	1.14
BrMUR3com #10-2	12.81	4.94	9.995	78.04	28.19	31.99	16.21	23.83	1.23
BrMUR3com #10-3	12.29	5	9.84	77.83	28.51	32.44	17.04	24.22	1.23
BrMUR3com #11-1	12.99	4.8	10.17	77.89	28.23	34.24	16.72	23.33	1.09
BrMUR3com #11-2	12.22	4.67	10.34	76.25	29.17	33.17	16.32	22.27	1.07
BrMUR3com #11-3	12.28	4.92	10.09	78.36	29	33.088	17.36	22.19	1.14
BoMUR3com #21-1	11.78	4.87	10.03	79.62	27.94	35.73	16.85	22.56	1.14
BoMUR3com #21-2	12.68	5.29	9.43	78.95	30.7	34.73	15.82	22.33	1.19
BoMUR3com #21-3	12.44	5.14	10.24	76.63	28.95	33.64	17.44	22.31	1.26
BoMUR3com #22-1	13.12	5.51	10.33	74.47	30.02	33.15	16.35	22.55	1.26
BoMUR3com #22-2	12.43	5.04	10.17	73.71	29.53	32.75	16.98	22.86	1.26
BoMUR3com #22-3	13.15	5.05	9.79	81.32	31.65	35.5	16.17	22.99	1.38
